# Supplementary material for: Inhibition of circulating exosomal microRNA-15a-3p accelerates diabetic wound repair
Source: publisher site journal article supplement (doi:10.18632/aging.103143), 2020-05-21
Supplement: Supplementary file [file aging-v12i10-103143-supplementary-material-SD1.pdf]

## SUPPLEMENTARY FIGURE

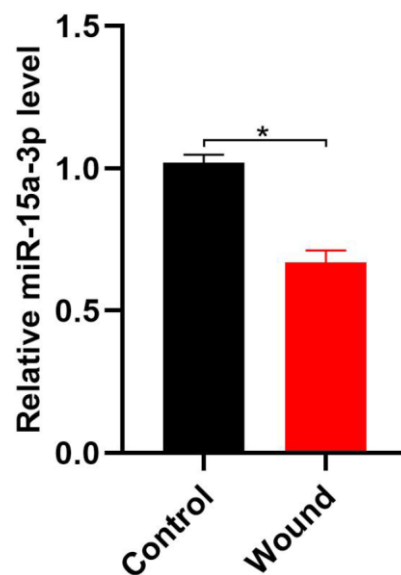

**Supplementary Figure 1. The expression level of miR-15a-3p in HUVECs with different treatments.** The scratch HUVECs injury was induced in a 24-well Petri dishes, which were manually scratched with a 10  $\mu$ l plastic stylet needle following a 4 $\times$ 4 square grid (with 4-mm space between each line). This scratch injury was regarded as wound group, and untreated cells were used as controls.
